# 1 Transient oscillations of neural firing 2 rate associated with routing of 3 evidence in a perceptual decision

4 Naomi N Odean<sup>1\*</sup>, Mehdi Sanayei<sup>1,§</sup>, Michael N Shadlen<sup>1,2,3\*</sup>

**\*For correspondence:**

[nno2106@columbia.edu](mailto:nno2106@columbia.edu) (NNO);  
[shadlen@columbia.edu](mailto:shadlen@columbia.edu) (MNS)

**Present address:** <sup>§</sup>School of  
Cognitive Science, Institute for  
Research in Fundamental Sciences <sup>8</sup>  
(IPM), Tehran, Iran

5 <sup>1</sup>Zuckerman Mind Brain Behavior Institute, Department of Neuroscience, Columbia  
6 University, New York, United States; <sup>2</sup>Howard Hughes Medical Institute, Columbia  
7 University, NY, USA; <sup>3</sup>Kavli Institute

---

9 **Abstract** To form a perceptual decision the brain must acquire samples of evidence from the  
10 environment and incorporate them in computations that mediate choice behavior. While much is  
11 known about the neural circuits that process sensory information and those that form decisions,  
12 less is known about the mechanisms that establish the functional linkage between them. We  
13 trained monkeys to make difficult decisions about the net direction of visual motion under  
14 conditions that required trial-by-trial control of functional connectivity. In one condition, the  
15 motion appeared at different locations on different trials. In the other, two motion patches  
16 appeared, only one of which was informative. Neurons in the parietal cortex produced brief  
17 oscillations in their firing rate at the time routing was established: upon onset of the motion  
18 display when its location was unpredictable across trials, and upon onset of an attention cue that  
19 indicated in which of two locations an informative patch of dots would appear. The oscillation  
20 was absent when the stimulus location was fixed across trials. We interpret the oscillation as a  
21 manifestation of the mechanism that establishes the source and destination of flexibly routed  
22 information, but not the transmission of the information *per se*.

---

## 24 Introduction

25 Human and animal behavior is remarkably flexible. We can execute a particular action in response  
26 to a wide variety of prompts. In a lab setting, a monkey might move its eyes to a location because a  
27 visual target had been flashed there a moment ago or because a visual stimulus at another location  
28 (or a tone) predicts a reward for this eye movement. In both scenarios there is an elevation of  
29 the firing rate of neurons that direct attention and orienting responses to the target. In the first  
30 case, the sensory input prompting this activation comes from neurons in the visual cortex with  
31 receptive fields that overlap the target location. In the second, the sensory input is from visual  
32 cortical neurons with receptive fields that do not overlap the target (or from auditory cortex). In  
33 the setting of decision making, we might say that there are many possible sources of evidence  
34 that could bear on the decision to choose a particular response. Therein lie the seeds of a routing  
35 problem that is central to cognition (*Zylberberg et al., 2010*). A general mechanism for routing is  
36 currently unknown and there is no guarantee that there is just one solution. However the study of  
37 attention and executive control implicate a role of oscillatory activity and/or synchronous spiking  
38 in the process (*Gregoriou et al., 2012; Lee et al., 2013; Salmann et al., 2007; Pesaran et al., 2008;*  
39 *Dean et al., 2012; Stanley et al., 2018*).

40 We examined information routing in the context of perceptual decision-making, using a well

41 studied direction discrimination task (*Newsome and Pare, 1988; Britten et al., 1992*). The subject, a  
42 rhesus monkey, must determine the net direction of dynamic random dots, only a fraction of which  
43 are informative at any moment. The decision is indicated by a saccadic eye movement to one of  
44 two choice-targets located on opposite sides of the random dot display. The decision is easy when  
45 many of the dots are moving coherently (strong motion); it is difficult when most of the dots are  
46 randomly replotted and only a small fraction of the dots are informative (weak motion). To perform  
47 well, the subject must accumulate noisy evidence over time. This accumulation is reflected in the  
48 activity of neurons in the lateral intraparietal area (LIP) with receptive fields that overlap one of the  
49 choice targets (*Shadlen and Newsome, 1996*)—an observation that presupposes a solution to a  
50 routing problem. Momentary evidence from direction selective neurons in area MT, with receptive  
51 fields that overlap the motion, must route their information, directly or indirectly, to neurons in LIP  
52 that represent the choice targets (*Salzman et al., 1992; Shadlen and Kandel, 2021*). This routing  
53 could not be anticipated by evolution. In some cases it might be established through learning,  
54 while in others it may need to be established on the fly. Here, we focus on the latter scenario.

55 We used two tasks that require a solution to the routing problem on each experimental trial. In  
56 the first, a visual cue instructs the monkey to make its decision about one of two patches of random  
57 dots (*cued attention task*). In the second, a single patch of motion appears at an unpredictable  
58 location (*variable location task*). In both tasks LIP neurons exhibit decision related activity during  
59 motion viewing, consistent with successful routing on most trials. We reasoned that the routing  
60 must be established after the onset of the attention cue or the motion stimulus and before the  
61 neurons in LIP begin to represent the accumulating evidence. We observed a prominent oscillation  
62 in the firing rates of single neurons in these epochs. The oscillation is aligned to the onset of the  
63 instructive cue in the cued attention task and to the onset of the motion stimulus itself in both tasks.  
64 The oscillations are brief and limited to the epoch preceding the representation of the accumulating  
65 evidence. We propose that they are signatures of the mechanisms that establish the routing of  
66 evidence to the site of its incorporation in a decision, but they do not appear to play a role during  
67 the information transfer accompanying decision formation.

## 68 Results

69 Four rhesus monkeys (*Macaca mullata*) were trained to perform variations of the random dot mo-  
70 tion (RDM) task that required trial by trial changes in routing. In the *cued attention task* (Fig. 1A),  
71 two patches of random dot motion were presented on each trial, preceded by a cue that indicated  
72 which location the monkey must attend to. The monkey received a reward if it chose the direction  
73 of motion in the cued patch. In the *variable location task* (Fig. 1B), just one patch of motion was  
74 presented, but its location was unpredictable.

75 In the cued attention task, both monkeys based their decisions on the relevant motion patch  
76 in at least 90% of trials (Fig. 2A) and their performance accuracy improved as a function of viewing  
77 duration at a rate consistent with temporal integration of evidence to a stopping bound, as shown  
78 previously (*Kiani et al. 2008*; Fig. 2B). However, neither monkey was able to fully ignore the uncued  
79 patch, as evidenced by the shallower choice function on the trials in which the motion patches had  
80 opposite directions (open symbols, Fig. 2A). At the strongest motion strength ( $\pm 51\%$  coh), errors  
81 occurred on 11% of trials when the patches contained opposite directions, compared to 3% when  
82 the patches shared the same direction. Some of these errors are explained by a failure to route  
83 information from the appropriate patch. The curves in Fig. 2A & B are fits to a drift diffusion model  
84 that takes into account both motion strength and viewing duration. Importantly, it allows for the  
85 possibility that the uncued patch of dots is not fully suppressed, and on a random fraction of trials,  
86  $\lambda$ , the monkey bases the decision on that patch (see Methods, Behavior and Table 1). In the variable  
87 location task, the monkeys made fewer than 2% errors when motion was strongest, nearly all of  
88 which were on trials with duration of less than 0.3 s (Fig. 2B). This performance is comparable to  
89 similar tasks in which the location of the motion stimulus was predictable (*Fetsch et al., 2014; Gold*

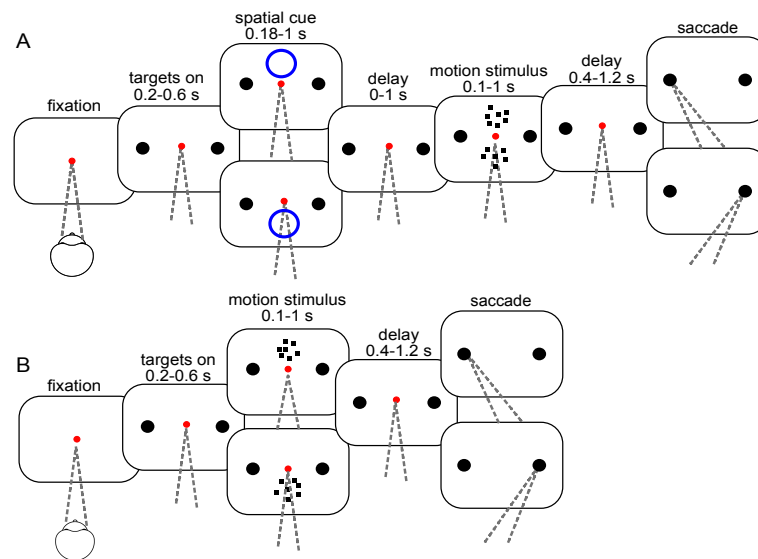

**Figure 1. Task flow.** **A**, Cued Attention task. After the monkey acquires fixation, two choice-targets appear, followed by a brief spatial cue (blue circle). After a delay, two random dot motion patches appear. The motion strength is the same in the two patches, but the directions may be the same or opposite. When the fixation point is extinguished, the monkey indicates the direction of the cued motion with a saccade to the left or right choice target and receives a reward if the choice corresponds to the direction of the cued patch. **B**, Variable Location task. Same as in **A** except there is no attention cue, and only one patch of motion is shown, either above or below the point of fixation.

90 *and Shadlen, 2000*). For the monkey that performed a free response version of the task, both  
 91 reaction time and choice depended on the strength of motion (Fig. 2C).

## 92 Neural recordings

93 The data comprise 173 neurons from LIP of four monkeys (see Table 2). All neurons were screened  
 94 for spatially selective persistent activity in oculomotor delayed response (ODR) tasks. One of the  
 95 saccadic choice targets ( $T_{in}$ ) was placed in the neural response field, typically in the contralateral  
 96 visual field (see Methods). Such neurons are known to reflect the accumulation of evidence bearing  
 97 on the decision to choose  $T_{in}$ . As shown in Fig. 3, the neural response begins to reflect the direction  
 98 and strength of motion approximately 200 ms after motion onset, and this holds whether the  
 99 source of evidence is from the upper or lower location. In the cued attention task, the decision-  
 100 related activity is also affected by the direction of motion of the uncued patch (*Figure 3—figure*  
 101 *Supplement 2*), consistent with the higher error rate on trials with motion in opposite directions.

102 It thus appears that by 200 ms of the onset of motion, some mechanism must establish func-

| Task                   | Monkey | $\kappa$ | $B$  | $C_0$  | $\kappa_{opp}$ | $\lambda$ |
|------------------------|--------|----------|------|--------|----------------|-----------|
| Cued attention         | Dm     | 7.9      | 0.74 | -0.047 | 4.6            | 0.029     |
| Cued attention         | Np     | 17.9     | 0.44 | -0.011 | 7.9            | 0.006     |
| Variable location      | Dm     | 10.3     | 0.64 | 0.013  |                |           |
| Variable location      | Ap     | 11.4     | 0.61 | -0.001 |                |           |
| Variable location (FR) | Dz     | 17.1     | 0.74 | -0.02  |                |           |

**Table 1.** Parameters for model fits. Variables are defined in Eqs. 2, 4 and 5. Model comparison favors inclusion of  $\kappa_{opp}$  and  $\lambda$  for both monkeys (BIC: 609 and 773 for Dm and NP). Inclusion of both parameters is superior to just one. For Dm, BIC = 9.7 (comparison to  $\kappa_{opp} = \kappa$ , which attributes nearly all errors at  $\text{coh} = \pm 0.52$  to use of the wrong patch). For Np, BIC = 71 (comparison to  $\lambda = 0$ ). Free response task (FR) includes constant parameters,  $T_{nd}^{\text{right}} = 0.33$  and  $T_{nd}^{\text{left}} = 0.34$ , which accounts for sensory and motor latencies that add to the decision time to explain the total response time.

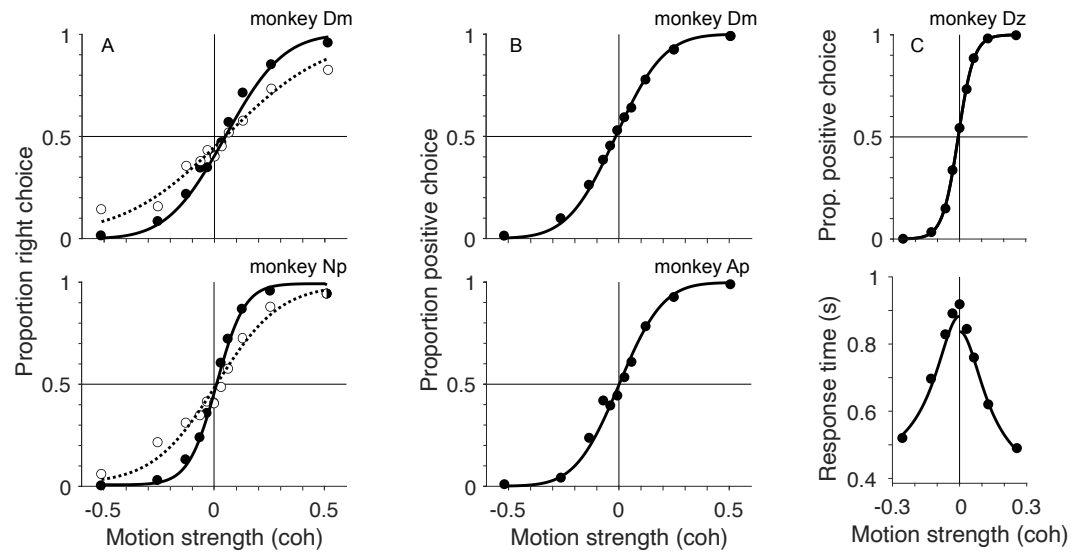

**Figure 2. Behavior.** **A**, Cued attention task. Proportion of rightward choices is plotted as a function of signed motion strength of the cued patch (positive coherence signifies rightward). Filled and open symbols show trials where the direction of uncued motion patch was the same or opposite to the cued patch, combining trials for all viewing durations. Solid and dashed curves are fits of a bounded drift-diffusion model that incorporates misrouting owing to incomplete suppression of the uncued patch or attending to it erroneously on a fraction of trials. The curves represent the expectation of the choice-proportions for the mean stimulus duration (*top*, monkey Dm; *bottom*, monkey Np). **B**, Variable location task with random stimulus durations. There is only one patch of motion. The proportion of choices in the positive direction (favoring the target in the neural response field) is plotted as a function of signed coherence. The smooth curve is a fit to a simpler bounded drift diffusion model. As in **A**, the proportions reflect all stimulus durations, and the fit shows predictions for the mean duration (*top*, monkey Dm; *bottom*, monkey Ap). **C** Choice-response time version of the variable location task. The choices (*top*) and response times (*bottom*) are fit by a bounded drift-diffusion model. Fit parameters for all monkeys and conditions are in Table 1

|                        | Np | Dm | Ap | Dz | Nt* | Br* |
|------------------------|----|----|----|----|-----|-----|
| Cued attention         | 60 | 49 |    |    |     |     |
| Variable location      |    | 28 | 23 |    |     |     |
| Variable location (FR) |    |    |    | 13 | 28  | 21  |
| Fixed location (FR)    |    |    |    |    | 64  | 52  |

**Table 2.** Number of neurons recorded from each monkey in the tasks (FR, free response task; \* previously published data).

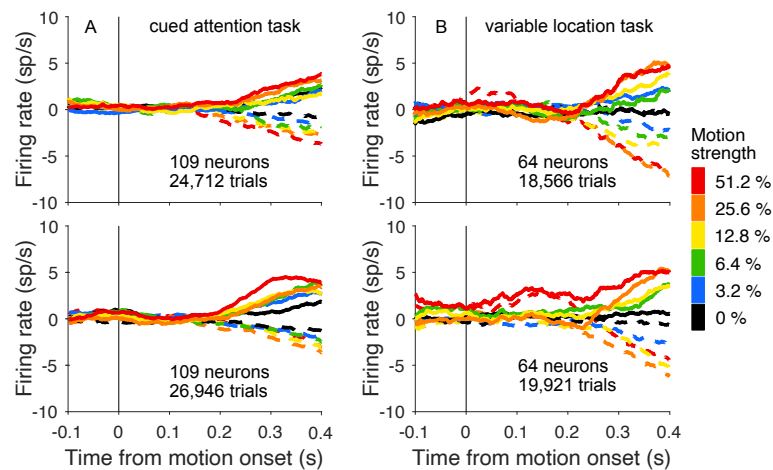

**Figure 3. LIP neurons reflect evidence from the attended patch of motion. A,** Activity of 109 neurons studied in the cued attention task when the upper patch (*top*) and lower patch (*bottom*) were cued as informative (combined data from monkeys Dm and Np). Responses are detrended by neuron, via subtraction of the mean firing rate, as function of time, on the lowest coherences (0% and  $\pm 3.2\%$ ). Errors on non-zero coherences are excluded. The neurons reflect the formation of decision from information derived from the upper and lower visual field. **B,** Activity of 64 neurons studied in the variable location task when the motion patch appeared in the upper (*top*) or lower (*bottom*) location (combined data from monkeys Dm, Ap and Dz).

**Figure 3—figure supplement 1.** Firing rates aligned to all task relevant events

**Figure 3—figure supplement 2.** Comparison of responses when motion patches had the same or opposite directions

**Figure 3—figure supplement 3.** Neural responses shown separately for each monkey and task

112 tional connectivity between LIP neurons that represent the choice-targets and the relevant direction-  
113 selective neurons with receptive fields that overlap the RDM. In the cued attention task, this routing  
114 might occur following the attention cue. In the variable location task, only the onset of the RDM is  
115 informative. In what follows we demonstrate a brief oscillation in the firing rates of LIP neurons.  
116 We first characterize the timing and strength of the oscillations in the two tasks. We then report  
117 additional observations that suggest the oscillations are associated with a mechanism that estab-  
118 lishes the functional connectivity between sources of evidence and the circuits in LIP that use this  
119 evidence to establish the relative priority of the choice targets. In the Discussion, we consider how  
120 such oscillations might bear on neural mechanisms of routing.

#### 121 Oscillations in the cued attention task

122 Fig. 4A–D shows prominent oscillations in the firing rate of two example neurons, aligned to onset  
123 of the attention cue. Importantly, the cue, like the random dot motion, was presented outside  
124 the neural response field (see Methods, Mapping tasks). One of the neurons (Dm49) exhibits 3–4  
125 evenly spaced periods of increased activity ( $\sim 16.7$  Hz) when the cue signaled that the relevant patch  
126 of motion would appear in the upper location. The other neuron (Dm35) exhibits a similar period  
127 but with a more pronounced decay in amplitude, independent of whether the cue appeared in the  
128 upper or lower location. These examples are among the most vivid in the data set. In most cases  
129 the oscillations are imperceptible in the trial rasters. The examples also highlight heterogeneous  
130 features, such as the rate of decay and spatial preference, that we will not dwell upon. What stands  
131 out as consistent is the timing, periodicity and transient nature of the oscillations. These features  
132 are preserved in the firing rate averages across the population of neurons (Fig. 4E,F).

To further characterize the amplitude and frequency of these oscillations we applied a match-  
ing pursuit (MP) algorithm (Chandran et al., 2016; Mallat and Zhang, 1993) to the the across-trial  
average spike rate functions for each neuron. MP is especially useful for brief periodic signals, as it  
measures power with high temporal resolution (see Methods). We report the average Wigner-Ville

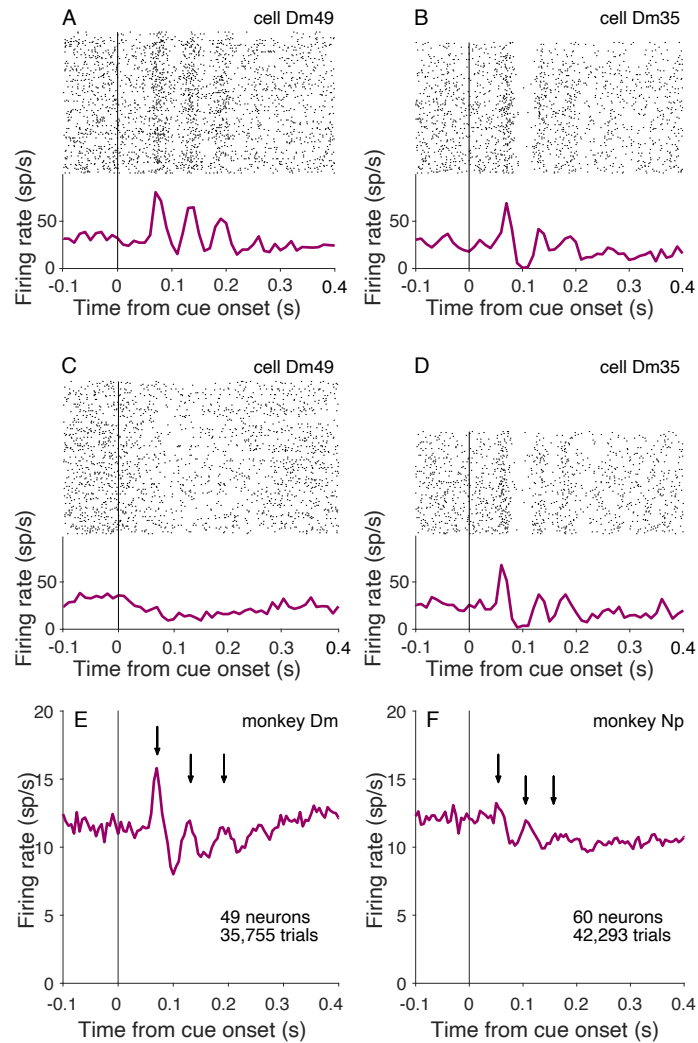

**Figure 4. Oscillations at cue onset in the cued attention task.** **A,B**, Activity of example neurons with the cue above fixation. *Top* Raster plot of spike times relative to onset of the attention cue. *Bottom* peri-event histogram shows average firing rates across trials (bin width 10 ms). **C,D**, Cue aligned activity of the same example neurons for trials with the cue below fixation. **E,F**, Average activity across all neurons combining both cue locations (bin width 5 ms). Arrows indicate peaks after motion onset.

**Figure 4—figure supplement 1.** Oscillations in spiking activity measured using a matching pursuit algorithm.

**Figure 4—figure supplement 2.** Realigning does not identify additional peaks

128 power,  $\bar{P}$ , in the 12–20 Hz range using 90 ms epochs preceding and following onset of the atten-  
129 tion cue, denoted  $\bar{P}_{\text{pre}}^{12:20}$  and  $\bar{P}_{\text{post}}^{12:20}$  ( $-90 \leq t < 0$  and  $40 \leq t < 130$  ms, respectively). We use the same  
130 nomenclature below, when aligning the response to other task events. The superscript identifies  
131 the range of frequencies contributing to the  $\bar{P}$  statistic. The majority of neurons recorded in the  
132 cued attention task exhibit an increase in  $\bar{P}^{12:20}$  after cue onset ( $\bar{P}_{\text{post}}^{12:20} > \bar{P}_{\text{pre}}^{12:20}$ ,  $p < 0.05$ , 65 of 109  
133 neurons). The presence of oscillations is similar for putative excitatory and inhibitory neurons (as-  
134 certained from spike waveform analysis; see Methods, Cell type analysis). Across the population,  
135 the mean  $\bar{P}_{\text{post}}^{12:20}$  was  $1.52 \pm 0.49 \text{ sp}^2\text{s}^{-2}$ , an order of magnitude larger than  $\bar{P}_{\text{pre}}^{12:20}$  ( $0.12 \pm 0.03 \text{ sp}^2\text{s}^{-2}$ ;  
136  $p < 0.0001$ ). In comparison, Wigner-Ville power in the 4–11 Hz band does not undergo change ( $\bar{P}_{\text{pre}}^{4:11}$   
137 and  $\bar{P}_{\text{post}}^{4:11}$  are  $1.27 \pm 0.29$  and  $1.32 \pm 0.27 \text{ sp}^2\text{s}^{-2}$ , respectively;  $p = 0.35$ ).

138 The oscillation in firing rate is triggered by the onset of the cue, and decays quickly thereafter.  
139 By 0.18 s after cue onset,  $\bar{P}^{12:20}$  is only  $0.067 \pm 0.026 \text{ sp}^2\text{s}^{-2}$ , which is comparable to  $\bar{P}_{\text{pre}}^{12:20}$  ( $p = 0.09$ ).  
140 We wondered if the oscillations are truly brief or are simply undetectable as a consequence of de-  
141 phasing. To test this, we used a piecewise linear time warp designed to realign temporally jittered  
142 oscillations (Williams et al., 2020). While this algorithm successfully realigned jittered synthetic  
143 data, it did not identify any new peaks in the neural data (Figure 4—figure Supplement 2). We there-  
144 fore conclude that the oscillation is in fact short-lived and, in this case, caused by a task-relevant  
145 visual cue, outside the neural response field.

146 A weak oscillation in the firing rate is also present after motion onset. Fig. 5A–D shows the  
147 activity of the same example neurons shown in Fig. 4A–D, aligned to onset of the random dot  
148 displays. The oscillations are apparent in the rasters and average firing rates for both neurons.  
149 As shown in Fig. 5E–F, they are also evident in the average firing rate across the population of  
150 neurons. They are weaker than the oscillations induced by the attention cue ( $p < 0.0001$ ; Fig. 5G),  
151 but they are statistically reliable:  $\bar{P}_{\text{post}}^{12:20}$  is an order of magnitude larger than  $\bar{P}_{\text{pre}}^{12:20}$  ( $0.80 \pm 0.30$  vs.  
152  $0.06 \pm 0.01 \text{ sp}^2\text{s}^{-2}$ ,  $p < 0.0001$ ). The weaker oscillation following motion onset is consistent with the  
153 hypothesis that these oscillations play a role in establishing functional connectivity. In the cued  
154 attention task, information about the location of the relevant motion patch was already supplied  
155 by the cue.

156 We also detected oscillations in the local field potential recordings made from the same elec-  
157 trode used for the neural recordings. The LFPs revealed oscillations similar to those detected in  
158 the spiking activity. For example, Fig. 6A shows the average LFP for monkey Dm, aligned to the  
159 onset of the attention cue. The gray arrows are copies of the black arrows in Fig. 4, which show the  
160 peaks in the firing rate oscillations from the same experiments. The oscillations in the LFP record-  
161 ings from monkey Np are less pronounced, but some deflection is evident at the time of the peaks  
162 in spike rate, shown by the gray arrows in Fig. 6B. For both monkeys,  $\bar{P}_{\text{post}}^{12:20}$  is greater than  $\bar{P}_{\text{pre}}^{12:20}$  for  
163 both cue and motion onset ( $p < 0.0001$ ), and like the firing rate oscillations,  $\bar{P}^{12:20}$  at motion onset  
164 is weaker than at cue onset ( $p < 0.0001$ , Fig. 6C).

165 The oscillations in the LFP and firing rates appear to be manifestations of a common underlying  
166 mechanism. In addition to the similarity in their timing and frequency, there is a tendency for spikes  
167 to occur in the trough of the LFP oscillation ( $p < 0.0005$ ; Fig. 6D). The frequency histogram of spike  
168 phases is obtained by extracting the dominant Gabor atom from the matching pursuit analysis of  
169 the LFP. The spike phases are the inverse cosine of the carrier at the time of the spike, such that zero  
170 and  $\pi$  are the peak and nadir of the carrier, respectively (see Methods, Spike-field alignment). The  
171 observation is unsurprising given the similarity of the signals, but it is not an artifact of recording  
172 the LFP and action potentials from the same electrode. Similar oscillations in the LFP are present  
173 at electrodes that pick up few (or zero) spikes.

#### 174 Oscillations in the variable location task

175 In the variable location task, it is the appearance of the random dot motion itself that resolves  
176 the uncertainty about the source of evidence bearing on the decision. As in the cued attention  
177 task, the routing must be established between direction selective neurons in the visual cortex that



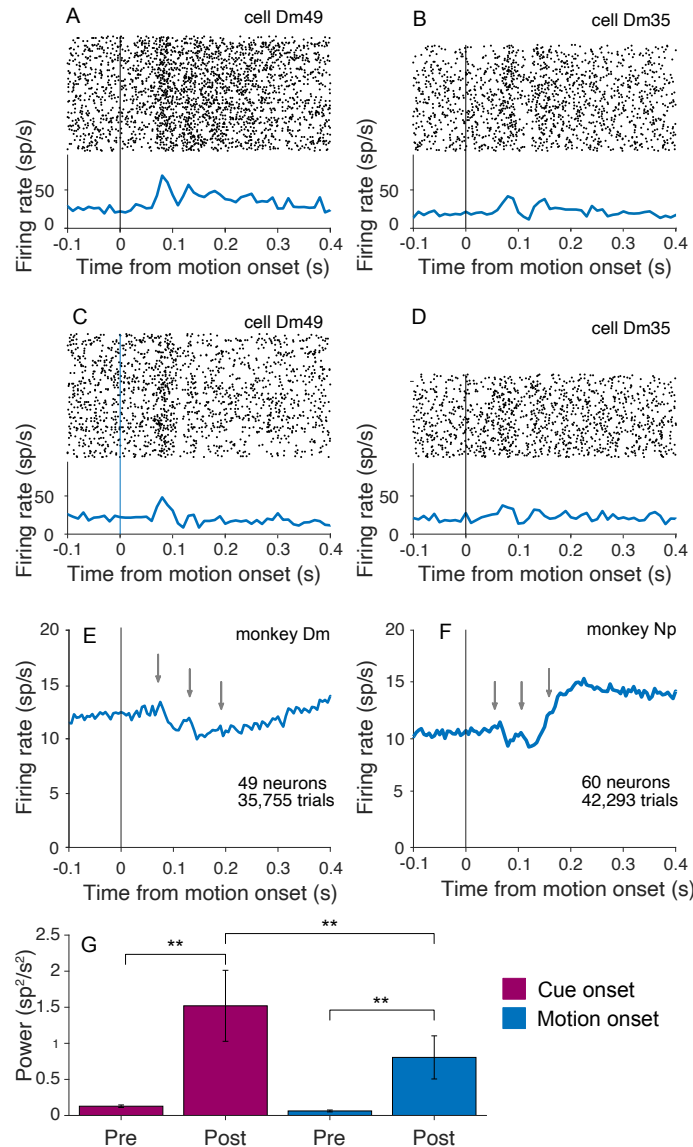

**Figure 5. Oscillations at motion onset in the cued attention task.** **A-D**, Activity of the neurons shown in Fig. 4A-D, aligned here to the onset of random dot motion. Attention was cued to the upper patch in *A* and *B* and to the lower patch in *C* and *D*. **E,F**, Average activity across all neurons in both locations. Gray arrows mark the positions of the peaks in activity in Fig. 4E & F. **G**, Average  $\bar{P}_{pre}^{12:20}$  and  $\bar{P}_{post}^{12:20}$ , across all neurons from both monkeys, in 90 ms epochs before and after onset of the attention cue and random dot motion stimulus. Asterisks indicate significant differences (\*, \*\*:  $\alpha = 0.05, 0.01$ ; error bars are s.e.m.).



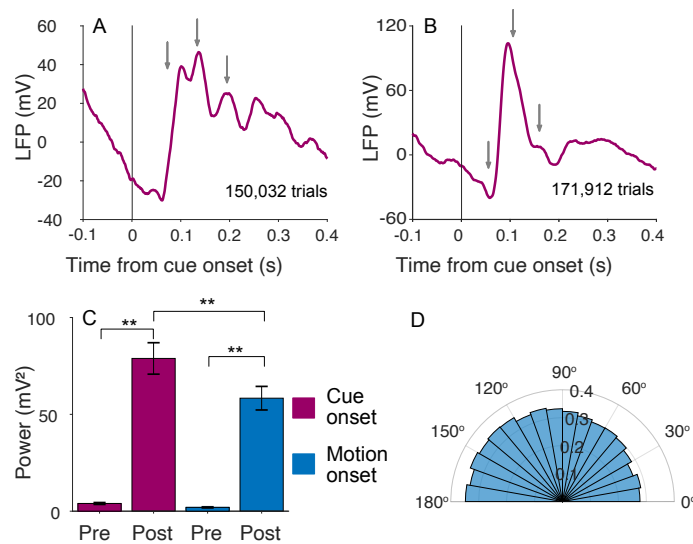

**Figure 6. Oscillations are present in the local field potential.** **A,B**, Average baseline-corrected LFP from monkeys Dm and Ne, respectively, aligned to onset of the attention cue in the cued attention task. Gray arrows mark the peaks in firing rate activity shown in Fig. 4E & F. **C**, Average  $\bar{P}_{pre}^{12:20}$  and  $\bar{P}_{post}^{12:20}$ , across all sites and both monkeys, measured in 90 ms epochs preceding and following onset of the attention cue and random dot motion. Same conventions as Fig. 5. **D**, Phase alignment of spikes with LFP. Histogram shows the number of spikes in 30° bins of phase. The phases refer to the cosine carrier of the best Gabor. There is a tendency for spikes to occur more frequently near the trough of the LFP (see Methods, Spike-field alignment).

178 represent the motion and the LIP neurons that represent one of the choice-targets. Here however,  
 179 connectivity must be established between the onset latency of visual cortical neurons and the  
 180 beginning of evidence accumulation—roughly 40–200 ms from motion onset. The example neuron  
 181 shown in Fig. 7A–B exhibits oscillations in the firing rates similar to those in the cued attention task.  
 182 They are also evident in the pooled firing rates across 64 neurons from the three monkeys (Fig. 7C  
 183 and **Figure 7—figure Supplement 1**). The average  $\bar{P}_{post}^{12:20}$  is two orders of magnitude larger than  
 184  $\bar{P}_{pre}^{12:20}$  ( $2.3 \pm 1.2$  and  $0.034 \pm 0.005$  sp<sup>2</sup>s<sup>-2</sup>, respectively;  $p < 0.0001$ ).

185 The task comprises alternating blocks of fixed and variable stimulus locations. In the former  
 186 case, it may not be necessary to establish the appropriate functional connectivity on every trial.  
 187 We therefore predicted that signals associated with routing might be diminished in these blocks.  
 188 Indeed  $\bar{P}_{post}^{12:20}$  was slightly reduced on trials where the motion stimulus location was fixed ( $p <$   
 189  $0.01$ , permutation test). While significant, there are aspects of the design that might weaken this  
 190 comparison. In particular the monkey had learned to expect the RDM to appear in various locations,  
 191 and may not have adapted fully to the blocked design. We therefore augmented this analysis with  
 192 a reanalysis of two older data sets, which are better suited to test our hypothesis.

193 Two monkeys reported in *Roitman and Shadlen (2002)* were trained and studied with random  
 194 dot motion viewed at the center of the visual field. One year later, the same monkeys were re-  
 195 trained and studied on a variable location task (included in *Shushruth et al. 2018*). We sought to  
 196 determine whether oscillations in the firing rates were present following onset of the random dot  
 197 motion. As shown in Fig. 8, we did not detect oscillations in the recordings from either monkey in  
 198 the earlier *fixed location* study, whereas they are clearly present in the data from same monkeys—  
 199 and same LIP—in the variable location design (Table 3E). While the study was not designed with  
 200 this longitudinal comparison in mind, it provides support for the hypothesis that the transient os-  
 201 cillations are associated with neural mechanisms responsible for flexible routing. It also rebuts the  
 202 assertion that the oscillations are triggered by any task-relevant visual stimulus. The oscillations  
 203 appear to be associated with task events that resolve uncertainty about the source of information.

204 Of course, routing requires specification of both the source and destination of information. We

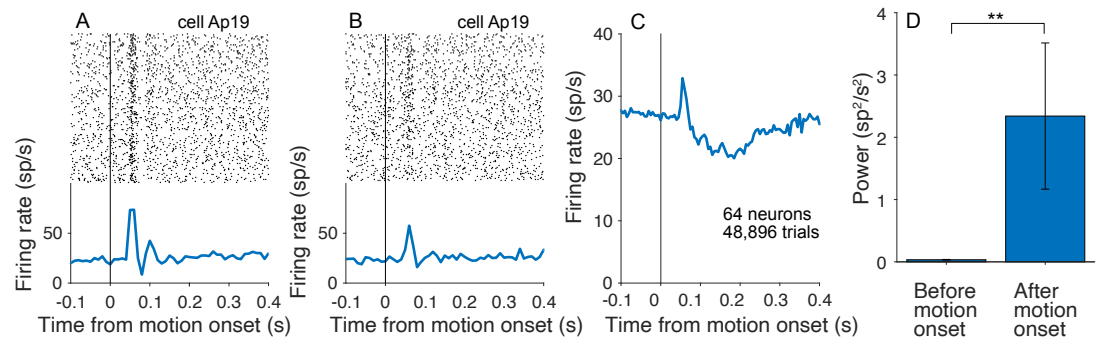

**Figure 7. Oscillations in the variable location task.** **A**, Activity of an example neuron with stimulus presented above fixation. *Top*, Raster plot of spike times relative to onset of random dot motion. *Bottom*, Average firing rates across trials (computed in 10 ms bins). **B**, Same neuron on trials when the motion stimulus appeared below fixation. **C**, Average firing rate, across all neurons from three monkeys. **D**, Average  $\bar{P}_{pre}^{12:20}$  and  $\bar{P}_{post}^{12:20}$ , across neurons, measured in 90 ms epochs preceding and following onset of random dot motion. Same conventions as Fig. 5G.

**Figure 7—figure supplement 1.** Oscillations in the variable location task for each monkey

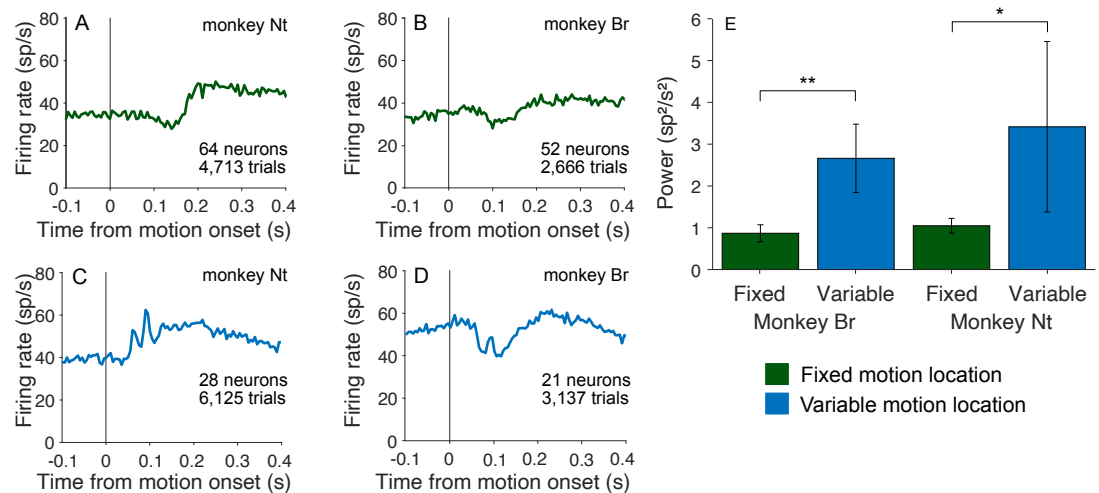

**Figure 8. Oscillations emerge after encountering conditions necessitating flexible routing.** Two monkeys were first trained and tested with random dot motion stimuli, presented at one central viewing location (*fixed location*). They were subsequently trained and tested with stimuli presented at a variety of locations (*variable location*). **A,B**, Average firing rate aligned to motion onset in the fixed location experiments. **C,D**, Average firing aligned to motion onset in the variable location experiments. **E**, Comparison of Average  $\bar{P}_{post}^{12:20}$  in the two conditions, by monkey. Same conventions as in previous bar graphs.

|          | Fixed location (FR)     |                          |         | Variable location (FR)  |                          |         |
|----------|-------------------------|--------------------------|---------|-------------------------|--------------------------|---------|
|          | $\bar{P}_{pre}^{12:20}$ | $\bar{P}_{post}^{12:20}$ | P-value | $\bar{P}_{pre}^{12:20}$ | $\bar{P}_{post}^{12:20}$ | P-value |
| Nt       | $0.8 \pm 0.2$           | $1.0 \pm 0.2$            | 0.06    | $0.3 \pm 0.1$           | $3.4 \pm 2.0$            | 0.04    |
| Br       | $0.8 \pm 0.1$           | $0.9 \pm 0.2$            | 0.61    | $0.2 \pm 0.1$           | $2.2 \pm 1.0$            | 0.0007  |
| Combined | $0.88 \pm 0.12$         | $0.97 \pm 0.13$          | 0.11    | $0.40 \pm 0.10$         | $2.6 \pm 0.9$            | 0.00001 |

**Table 3.** Oscillation power in fixed and variable stimulus location tasks. Units are  $sp^2s^{-2}$  (FR, free response task).

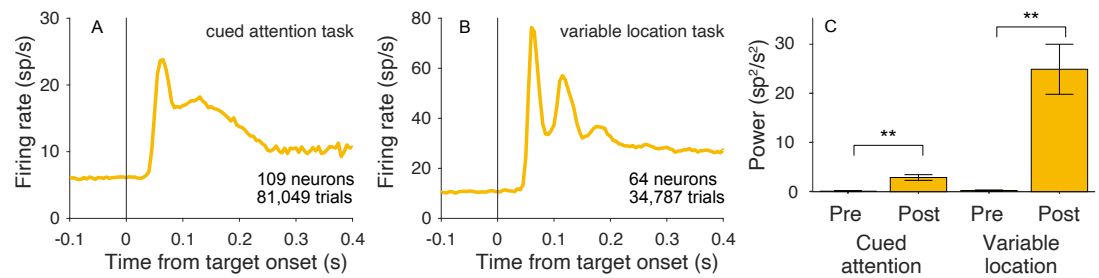

**Figure 9. Oscillations are present at target onset.** **A**, Average firing rate aligned to onset of the choice targets for both monkeys in the cued attention task. **B** Average firing rates aligned to onset of the choice targets for all three monkeys in the variable location task. **C**, Average  $\bar{P}_{pre}^{12:20}$  and  $\bar{P}_{post}^{12:20}$ , across neurons, measured in 90 ms epochs preceding and following onset of targets. Same conventions as in previous bar graphs.

205 therefore looked for oscillations following the onset of the choice targets. Recall that this event  
 206 precedes the attention cue in the cued attention task and the the RDM in the variable location  
 207 task. As shown in Fig. 9, oscillations are present in both tasks following onset of the choice targets  
 208 ( $p < 0.0001$ ), one of which is in the neural response field. They can also arise when both targets  
 209 appear outside the neural response field, but are relevant to the routing of other information in  
 210 the response field. This occurs in the second of the reanalyzed data sets, in blocks where the  
 211 RDM is displayed in the neural response field ( $0.21 \pm 0.07$  and  $0.54 \pm 0.11$   $\text{sp}^2\text{s}^{-2}$  for  $\bar{P}_{pre}^{12:20}$  and  $\bar{P}_{post}^{12:20}$ ,  
 212 respectively;  $p < 0.001$ ). This observation, like the attention cue in Fig. 4, is another example of an  
 213 oscillation caused by the onset of stimuli outside the neural response field, but relevant to neurons  
 214 that represent the predicted retinotopic location of the motion evidence.

## 215 Discussion

216 Unlike innate sensory-response programs, such as escape or courtship, evolution did not imbue  
 217 the brain with circuits devoted to the vast repertoire of decisions one encounters in life—including  
 218 the motion tasks studied here. Whereas the processing of motion and the organization of orient-  
 219 ing eye movements rely on dedicated sensory and motor circuits, the neural circuits responsible  
 220 for planning possible eye movements cannot exploit dedicated connections to the neurons that  
 221 represent all the possible sources of evidence bearing on such plans. The flexibility to learn which  
 222 sources are relevant and to route them in the moment are hallmarks of higher brain function.

223 We studied an example of flexible routing by introducing uncertainty about the source of visual  
 224 evidence bearing on a decision about motion direction. In one task, the location of a single patch  
 225 of random dots was varied randomly across trials. In the other, an attention cue indicated which  
 226 of two motion patches should inform the decision. In both tasks the decision is communicated by  
 227 a saccadic eye movement to one of two choice targets. An advantage of this highly studied percep-  
 228 tual decision is the accompanying quantitative framework that unites choice accuracy, sensitivity,  
 229 decision time, change of mind, and confidence (*Shadlen and Kiani, 2013*). We exploited this frame-  
 230 work to show that a portion of the errors on the cued attention task are explained by some form of  
 231 misrouting. Both monkeys fail to suppress all information from the uncued patch, and monkey Dm  
 232 appears to attend to the wrong patch altogether on 3–6% of trials, accounting for at least half of  
 233 the errors at the strongest motion coherence. The observations are consistent with a large body of  
 234 work in cognitive science that frames attention in terms of the control of information flow (*Driver,*  
 235 *2001; Posner, 1988; Posner et al., 2004; Buschman and Miller, 2009; Buschman and Kastner, 2015;*  
 236 *Panichello and Buschman, 2021*). In the present study, this control problem, what we refer to as  
 237 routing, must be completed by the time neurons in association cortex begin to integrate the sen-  
 238 sory evidence toward a decision. The destination of the routed information is specified when the  
 239 choice targets appear, but the source is uncertain until the onset of motion in the variable location  
 240 task and the onset of the attention cue in the cued attention task.

241 We discovered a neural correlate of this routing event in the lateral intraparietal area (LIP). We  
242 focused our recordings on neurons with two properties: (i) a response field that overlaps one of  
243 the choice-targets and (ii) spatially selective persistent firing rates during an oculomotor delayed  
244 response task. Such neurons are known to represent the accumulation of the noisy evidence used  
245 by the monkey to inform the saccadic choice, and we replicated this phenomenon (Fig. 3). We ob-  
246 served that many such neurons also exhibit a brief oscillation in firing rate that is time-locked to  
247 the moment when information about the source of evidence becomes available. The oscillation  
248 manifests as a transient excess of spikes that repeats one or more times at intervals of  $61 \pm 2$  ms  
249 ( $\sim 16$  Hz), and it appears to be coupled to the local field potential (Fig. 6). Striking examples like  
250 those in Figs. 4, 5 and 7 were rare, but the majority of cells showed an increase in oscillatory ac-  
251 tivity in this range, but they were undetectable in the data from *Roitman and Shadlen (2002)*, who  
252 presented the motion stimulus in the same location on all trials. The oscillations appeared in the  
253 same monkeys (and same recording sites) after they were trained to base their decisions on stim-  
254 uli that could appear in different locations (Fig. 8). This serendipitous observation supports the  
255 hypothesis that the phenomenon is associated with flexible routing of information from neurons  
256 that represent the stimulus motion to neurons in LIP that represent the decision. The connection  
257 path is almost certainly polysynaptic.

258 Previous studies have identified transient oscillations, also in the low beta range, that corre-  
259 late with performance on perceptual tasks (*Koelewijn et al., 2008; Haegens et al., 2011; Siegel*  
260 *et al., 2011*). For example, *Donner et al. (2007)* describe such oscillations originating from poste-  
261 rior parietal cortex following onset of a random dot motion stimulus. They reported that power  
262 was greater when a stimulus was correctly categorized as motion or noise (hits and correct rejects)  
263 than on misses and false alarms. We interrogated all of our data sets for such a relationship but  
264 found only one case: a small reduction in  $P^{12:20}$  aligned to motion onset on errors in the cued  
265 attention task ( $p < 0.006$ , permutation test). Other than this one case, we did not detect a con-  
266 vincing correlation between behavioral performance on the motion task and the magnitude of the  
267 oscillations. Perhaps we lack sufficient power. However it seems more likely that errors were not  
268 associated with a failure to route, but rather, a failure to route the right information. Consistent  
269 with this interpretation, *Fiebelkorn et al. (2013)* reported periodicity in detection accuracy during  
270 visual detection tasks. The periodicity was synchronized with cycles of the theta rhythm measured  
271 in the LFP recorded from area LIP, and the poor-detection phases were associated with *increased*  
272 power in an associated 10–18 Hz frequency band (*Fiebelkorn et al., 2018, 2019*), which the authors  
273 interpret as a sign of attentional shifts away from the task. These shifts in attention might involve  
274 the same routing processes as allocation of attention in our task.

275 Why would oscillations be associated with routing? One possibility is that they serve to syn-  
276 chronize spikes and thus increase their influence on downstream circuits (*Singer and Gray, 1995;*  
277 *Akam and Kullmann, 2010; König et al., 1995; Gregoriou et al., 2009; Fries, 2005, 2015; Buschman*  
278 *and Miller, 2009*). If so, they ought to be present during the epoch in which signals in upstream  
279 motion areas are affecting the LIP response. In our data, however, they are present only tran-  
280 siently, in the epoch preceding the transfer of information (cf. *Panichello and Buschman 2021*).  
281 We therefore infer that they are associated with the mechanism that establishes the connection  
282 rather than facilitating the flow of information directly. Of course, the oscillations themselves do  
283 not form the connections, but they may provide a clue to the underlying mechanism. Among the  
284 many challenges posed by routing is the need to identify the appropriate neurons at the source  
285 and destination. We suspect that the oscillatory signal is linked to this identification function.

286 It has been shown that field potentials (e.g., eCoG) are associated with calcium *plateau* poten-  
287 tials in apical dendrites of layer-5 pyramidal neurons (*Suzuki and Larkum, 2017*), and these same  
288 potentials are capable of inducing plastic changes at relevant time scales (e.g., behavioral time  
289 scale plasticity, *Magee and Grienberger 2020*). Such plateau potentials and their biochemical se-  
290 quelae might allow long range projections—especially feedback—to identify their targets, or for  
291 the targets of the projections to establish a state of receptivity to a signal that is broadcast widely

292 (*Quinn et al., 2021*). This would be a convenient way for feedback projections to pick out the causes  
293 of the activity that is feeding back. This might serve many functions, including learning to use those  
294 inputs again under the right conditions, or to bind in some way the cause of an event with its  
295 consequences. Oscillatory activity might be a signature of these inputs (*Zhang and Bruno, 2019*).  
296 Thus we are in agreement with a longstanding view that oscillations, measured mainly in the field  
297 potentials, herald a connection to cognitive states that firing-rates alone do not divulge (*Freeman*  
298 *et al., 1983; Singer and Gray, 1995; Fries et al., 2001; Crick and Koch, 2003*).

## 299 **Methods and materials**

300 Four adult male rhesus monkeys (*Macaca mulatta*) were implanted with a titanium headpost (Rogue  
301 Research, Montreal, Canada) and a plastic (Peek) recording chamber (Crist Instruments, Damascus,  
302 MD). The placement of the chamber was guided by 3D reconstruction of MRI scans (OsiriX DICOM  
303 Viewer, Pixmeo, Bernex, Switzerland) to ensure access to area LIP along the left intraparietal sul-  
304 culus. In the experiments, the monkeys were seated in a primate chair (Crist Instruments) that was  
305 custom fit to support the monkey's size and weight during head stabilization, allowing the monkey  
306 to adjust its posture below the head and thus prevent potential discomfort associated with head  
307 stabilization. Extracellular single-neuron recordings were made using quartz coated tungsten mi-  
308 croelectrodes (Thomas Recording GmbH, Giessen, Germany) or 16-channel V-probes or S-probes  
309 (Plexon), which were advanced (Mini Matrix drive, Thomas Recording) through a metal guide tube  
310 seated in a plastic grid. Electrical recordings were filtered and amplified (Ominplex recording sys-  
311 tem, Plexon Inc, Dallas, TX). Waveforms identified as single neuron action potentials were saved,  
312 and each occurrence was assigned a spike-time. The quality of isolation was confirmed offline  
313 based on interspike interval and clustering based on principal component analysis of the wave-  
314 forms (Plexon Offline Sorter, Plexon Inc, Dallas, TX).

315 All procedures were approved by the Columbia University IACUC and conform to the NIH guide  
316 for the care and use of laboratory animals (*National Research Council, 2011*).

## 317 **Behavioral tasks**

318 Monkeys were trained to perform a variety of oculomotor and perceptual tasks that required the  
319 monkey to maintain the gaze on a fixation point and to make saccadic eye movements to visual  
320 targets in the periphery (see Table 2). Eye position (gaze angle) was measured with high speed  
321 video tracking (EyeLink 1000, SR research). Acceptance windows for eye position during fixation  
322 was a square  $\pm 1.5^\circ$  from the fixation point (i.e.,  $9 \text{ deg}^2$ ). Here and throughout,  $^\circ$ , or *deg*, stands for  
323 degrees visual angle. For saccades to peripheral targets, the acceptance window was a  $\pm 5^\circ$  square  
324 around the target center. The criteria were relaxed for eccentricities exceeding  $12^\circ$ .

### 325 **Cued attention task**

326 Two monkeys were trained to perform a variation of a random dot motion direction-discrimination  
327 task used in previous studies (e.g., see *Roitman and Shadlen 2002*) in which two motion patches  
328 were shown, but only one was informative. In this cued attention task (Fig. 1) the monkey initiated  
329 a trial by fixating on a central red dot. After 0.35 s two white targets appeared, each with a diameter  
330 of 0.5 degrees visual angle. Target onset was followed by a delay period, drawn from a truncated  
331 exponential distribution

$$f(t) = \begin{cases} \frac{\alpha}{\tau} e^{-\frac{t-t_{\min}}{\tau}} & t_{\min} \leq t \leq t_{\max} \\ 0 & \text{otherwise} \end{cases} \quad (1)$$

332 where  $\tau = 0.1$ ,  $t_{\min} = 0.2$  s,  $t_{\max} = 0.6$  s, and  $\alpha$  is chosen to ensure the total probability is unity. Note  
333 that the expectation of  $t$  is less than  $t_{\min} + \tau$ , owing to truncation. In what follows all variable delay  
334 periods are described by a range,  $t_{\min}$  to  $t_{\max}$ , and  $\tau$  in Eq. 1.

335 The cue, a  $5^\circ$  blue ring, was flashed on the screen  $4.5^\circ$  directly above or below the fixation  
336 point for 0.18–1 s ( $\tau = 0.2$  s). After a 0–1 s delay ( $\tau = 0.15$  s), two motion patches appeared. The

337 monkey was required to attend to the cued motion patch while ignoring the irrelevant motion in  
338 the uncued stimulus. The direction of motion of the uncued stimulus was the same as that of the  
339 cued stimulus on one third of trials and opposite on two thirds. We found this ratio worked to  
340 minimize the influence of the uncued motion stimulus on the choices. Motion was always along  
341 the horizontal axis. For each trial, the strength of the net motion (motion coherence) was drawn  
342 uniformly from the set {0, 3.2, 6.4, 12.8, 25.6, 51.2}. The strength of motion for the two patches was  
343 matched to prevent the monkey from responding based on the easier motion stimulus rather than  
344 the relevant one. The cued location was assigned randomly between the two locations for each  
345 trial. Motion lasted for 0.1–1.5 s ( $\tau = 0.35$  s) and was followed by a 0.4–1.2 s delay ( $\tau = 0.15$  s). After  
346 this delay the red fixation point disappeared and the monkey indicated its response by a saccade  
347 to a left or right choice target.

348 One choice target was centered in the response field of the recorded neuron. The other was at  
349 the same elevation and azimuth in the opposite hemifield. The random dot motion was confined  
350 to two circular apertures (5° diameter) centered at the same elevation above and/or below the  
351 fixation point. The locations were determined by establishing the extent of the neural response  
352 field so as to avoid overlap. The monkey performed a series of delayed saccades (see Mapping  
353 tasks), and we ensured that saccadic targets (white spots, 0.5° diameter) did not elicit a visual or  
354 memory response when they overlapped the intended apertures.

### 355 Variable location task

356 In the variable location task, only one of the random dot patches was shown on the trial, and there  
357 was no attention cue. The same strategy was employed to determine the two locations, above and  
358 below the fixation point, but the the location on any trial was random (Bernoulli dist,  $P=0.5$ ). For  
359 monkeys Ap and Dz, the choice targets were not restricted to the same elevation in the visual field.  
360 One was centered in the neural response field (location  $A$ ); and the other was at location  $B$ , such  
361 that a virtual line  $AB$  passes through the fixation point ( $F$ ), and  $AF \cong BF$ ). The opposing directions  
362 of motion were parallel to  $AB$ . Monkey Dm was only trained on horizontal motion, so targets and  
363 motion shared the same elevation. The task was otherwise similar to the cued attention task.

364 For monkeys Ap and Dm, motion was displayed for 0.1–1 s (Eq. 1,  $\tau = 0.25$  s) and was followed  
365 by a 0.4–1.2 s delay ( $\tau = 0.15$  s). After this delay the fixation point disappeared and the monkey indi-  
366 cated its decision by making a saccade to one of the choice targets. Motion strengths were drawn  
367 from the same distribution as in the cued attention task for monkeys Dm and Ap; the strongest  
368 coherence was not included for monkey Dz. For this monkey we used a free response (choice-  
369 response time) design. the task was identical to the controlled duration version, except that a  
370 saccadic response was accepted any time after motion onset. For all monkeys, correct choices  
371 were rewarded with a drop of juice. Trials with 0% coh were rewarded randomly. Experiments  
372 were conducted in alternating blocks of 120 trials with either a fixed or variable stimulus location.  
373 In a fixed location block the motion stimulus appeared in one location for 60 consecutive trials and  
374 then appeared in the other location for 60 trials.

375 For monkeys Ap and Dz stimuli were shown on a 40 cm cathode-ray tube (CRT) monitor with a  
376 75 frame/second refresh rate. For monkey Dm, stimuli were shown on a 54 cm liquid crystal display  
377 (LCD) with an effective refresh rate of 60 frames per second. For this display, the interval between  
378 replotted frames was reduced from every third frame to every second frame. we adjusted the dot  
379 displacement to achieve consistent speed across display types (typically 5°/s).

### 380 Mapping tasks

381 We conducted two screening tasks to select neurons for study in the tasks. In both, the monkey  
382 maintained its gaze on a central fixation point (FP), and initiated a saccade when the FP was ex-  
383 tinguished. In the *memory saccade task*, 0.2–1 s ( $\tau = 0.2$  s) after attaining central fixation, a white  
384 target (0.5° diameter) was flashed in the periphery. After a memory delay of 0.7–1.2 s ( $\tau = 0.15$  s)  
385 from target onset, the fixation point was extinguished. disappeared and the monkey was free to



386 saccade to the cued location to receive a juice reward. The *overlap saccade task* was the same, ex-  
387 cept that the target remained visible throughout the delay period and the saccade. We refer to  
388 both these tasks as ‘oculomotor delayed response’ (ODR).

### 389 **Neuron selection and recording**

390 Recording sites were selected by 3D reconstruction of anatomical MRI (3T). The electrode was ad-  
391 vanced along the intraparietal sulcus at positions that are thought to correspond to the ventral  
392 portion of the lateral intraparietal area (LIPv; *Lewis and Van Essen 2000*) where one encounters  
393 many neurons with visual and perisaccadic responses. Within putative LIPv, we mapped all well  
394 isolated units using the overlap saccade task. Neurons with spatially selective persistent activity in  
395 this task were further mapped using the memory-saccade task. A neuron was included in the data  
396 set if it showed spatially selective persistent activity during the delay period of memory saccades  
397 and if the neural response field allowed for a task geometry compatible with the monkey’s train-  
398 ing. We excluded neurons *post hoc* if we obtained less than 240 trials before the signal to noise  
399 deteriorated to the point that the spike waveform was not adequately isolated (7/71 neurons).

400 In the cued attention task, a 16 channel probe was used to record several neurons simultane-  
401 ously. All channels were screened with the memory guided saccade task. The recording probe was  
402 positioned to maximize the number of recorded units showing memory activity. The task objects  
403 could not be placed optimally for all cells, but nearby cells tended to have similar response fields.  
404 The task geometry was optimized for the best isolated channel. This yielded 1–7 simultaneously  
405 recorded cells with acceptable task geometry: a choice target roughly centered in the response  
406 field and both motion patches outside the response field. Cells were sorted offline as for single  
407 electrodes. Particular attention was paid to whether waveform principal components, or spike  
408 rate changed over time to ensure that the same cell was recorded throughout the session. Mon-  
409 keys performed an ODR trial to each target location after every 40 trials on the motion task, and  
410 thorough screening was repeated at the end of the session to ensure that response fields were  
411 constant throughout the session. If a cell showed a change in any of these parameters, trials af-  
412 ter that change were excluded from analysis. Occasionally a new waveform appeared during the  
413 recording session. It was included in the analysis if (i) it was well isolated from background noise,  
414 (ii) exhibited a consistent waveform-principal components, spike rate, and response preference  
415 in the interleaved ODR trials, and (iii) showed an appropriate response field in the post session  
416 screening tasks.

### 417 **Data analysis**

418 Peristimulus time histograms (PSTHs) were generated by aligning spike times to an event of interest  
419 and finding the average number of spikes, across trials, in time-bins relative to the event. Time-bins  
420 were 5 ms wide for averages across neurons and 10 ms for single neurons. For the firing rate vs.  
421 time graphs (by coherence) traces in Fig. 3, the rates are obtained by convolving the point process,  
422  $\delta(t - s_i)$ , where  $s_i$  are spike times, with a non-causal boxcar filter of width 100 ms. This smoothing  
423 was not applied to any other plot or analysis, as it obscures the oscillations of interest. To better  
424 visualize the decision-related activity, we detrended the responses in Fig. 3. For each neuron we  
425 subtracted the average response to the 0 and  $\pm 3.2\%$  coherences. Figures show the average across  
426 neurons, with each neuron weighted by the number of recorded trials. Across the two tasks, 8 out  
427 of 173 neurons showed a preference for the ipsilateral direction during the motion viewing epoch.  
428 For these neurons, the sign of the motion was reversed in analysis of signed coherence (Fig. 3).

### 429 **Behavior**

430 The decision process leading to leftward and rightward choices is affected by the direction and  
431 strength of motion as well as the duration of the stimulus. The durations were controlled by the  
432 experimenter for the three monkeys displayed in (Fig. 2). For the fourth monkey, Dz, we used a  
433 free response (choice-response time) design. Decision formation in both designs is explained by a



434 process of bounded accumulation of noisy evidence, also known as bounded drift-diffusion (*Kiani*  
 435 *et al., 2008*). Accordingly, momentary motion evidence is integrated over time until it reaches one  
 436 of two bounds ( $\pm B$ ) or the evidence stream is turned off. The influence of the motion evidence  
 437 depends on the signed motion coherence ( $C$ ) and on a drift rate parameter ( $\kappa$ ).

$$dV = \kappa(C + C_0)dt + dW, \quad (2)$$

where  $W$  is a standard Wiener process (i.e.,  $dW$  is a sample drawn from a Normal distribution,  $\mathcal{N}\{0, \sqrt{dt}\}$ ). The initial state is  $V_{t=0} = 0$  and the process continues until  $|V(t)| \geq B$ . The time of this termination governs the response time in a free response task (e.g., monkey Dz), and simply curtails further integration when the stimulus duration is controlled experimentally. If the decision process is terminated when integrated evidence reaches a bound, the chosen direction is the sign of the bound reached. If a bound has not yet been reached before the evidence stream is turned off (at  $t = t_{\text{dur}}$ ) the chosen direction depends on the sign of the unabsorbed integrated evidence. The choice probability was modeled by fitting  $B$ ,  $\kappa$ , and a bias term  $C_0$  expressed as an offset in signed motion coherence (*Hanks et al., 2011; Urai et al., 2019*). These quantities are obtained by numerical solution of the Fokker-Planck equation, which yields a probability density comprising three components: (i)  $f_+(t|t \leq t_{\text{dur}})$ , the upper bound absorption times, (ii)  $f_-(t|t \leq t_{\text{dur}})$ , the lower bound absorption times and (iii)  $f_{\text{un}}(V|t = t_{\text{dur}})$  the values of the unabsorbed  $V$  at  $t = t_{\text{dur}}$ , such that

$$\int_0^{t_{\text{dur}}} f_+(t) + f_-(t)dt + \int_{-B}^{+B} f_{\text{un}}(V_{t_{\text{dur}}})dV = 1$$

438 The probability of a positive choice is

$$\tilde{P}_+(C, t_{\text{dur}}) = \int_0^{t_{\text{dur}}} f_+(t)dt + \int_0^{+B} f_{\text{un}}(V_{t_{\text{dur}}})dV_{t_{\text{dur}}} \quad (3)$$

and

$$\tilde{P}_-(C, t_{\text{dur}}) = 1 - \tilde{P}_+(C, t_{\text{dur}})$$

439 This specifies the *base* diffusion model without misrouting. The latter comprises (1) attention to the  
 440 wrong patch and (2) incomplete suppression of the uncued motion patch. For the base model, the  
 441 observed proportion of positive choices is  $P_+(C, t_{\text{dur}}) = \tilde{P}_+(C, t_{\text{dur}})$ . If the monkey attends to the  
 442 wrong motion patch on a fraction of trials,  $\lambda$ , then

$$P_+(C, t_{\text{dur}}) = \begin{cases} \tilde{P}_+(C, t_{\text{dur}}) & \text{same direction} \\ (1 - \lambda) \tilde{P}_+(C, t_{\text{dur}}) + \lambda \tilde{P}_-(C, t_{\text{dur}}) & \text{opposite direction} \end{cases} \quad (4)$$

443 To model incomplete suppression of the uncued patch, we allow for a different value of  $\kappa$  in Eq. 2  
 444 when the patches have the same or opposite directions

$$dV = \begin{cases} \kappa(C + C_0)dt + dW & \text{same direction} \\ \kappa_{\text{opp}}(C + C_0)dt + dW & \text{opposite direction} \end{cases} \quad (5)$$

445 where  $C$  is the signed coherence of the cued patch.

446 The models were fit separately for the two monkeys using maximum likelihood. The fitted  
 447 parameters are  $\{\kappa, C_0, B\}$  for the basic model without misrouting (df=3). Erroneous routing and  
 448 incomplete suppression add one degree of freedom apiece. We report the absolute value of the  
 449  $\Delta\text{BIC}$  to convey support of a model against an alternative (i.e, Bayes Factor >1; Table 1).

#### 450 Quantification of oscillations

451 We implemented a *matching pursuit* (MP) algorithm to quantify the strength of oscillations in the  
452 neural firing rates and local field potentials (*Chandran et al., 2016; Mallat and Zhang, 1993*). MP is  
453 a greedy algorithm designed to represent a finite signal,  $s(t)$ , as a sum of Gabor functions (atoms)  
454 from a library that covers the position  $\tau$  and width  $\sigma$  of the Gaussian envelope as well as the angular  
455 frequency  $\xi$  of the carrier sinusoids:

$$g_{\gamma}(t) = \frac{1}{\sqrt{\sigma}} e^{-\pi\left(\frac{t-\tau}{\sigma}\right)^2} e^{i\xi t} \quad (6)$$

456 where the subscript,  $\gamma$ , identifies the atom,  $\gamma = \{\tau, \sigma, \xi\}$ . MP is well suited to brief epochs containing  
457 mixtures of transient and periodic features. We used the open source algorithm developed by the  
458 Epilepsy Research Laboratory at Johns Hopkins Medical Institutions and Supratim Ray (available  
459 from <https://github.com/supratimray/MP>). For the spike rates,  $s(t)$  is the average firing rates across  
460 trials for a neuron, as shown in the example neurons (e.g., using  $-0.3 \leq t < 0.724$  s relative to the  
461 event of interest. For spiking data, the input is the averaged unsmoothed firing rate (1 ms bins).  
462 For LFP data, the input is the trial averaged voltage in (1 KHz sampling rate). The output is power  
463 as a function of time and frequency, as shown in **Figure 4—figure Supplement 1**. We define the  
464 low-beta power as the mean Wigner-Ville power ( $\bar{P}^{12:20}$ ) in the frequency band 12–20 Hz in the  
465 90 ms before or 40–130 ms after event onset, denoted  $\bar{P}_{\text{pre}}^{12:20}$  and  $\bar{P}_{\text{post}}^{12:20}$ , respectively. We typically  
466 report the mean  $\bar{P}^{12:20}$  across neurons ( $\pm$  s.e.m.) and determine statistical significance by applying  
467 a Wilcoxon signed-rank test (a nonparametric equivalent of the paired t-test), using  $\bar{P}_{\text{pre}}^{12:20}$  and  $\bar{P}_{\text{post}}^{12:20}$   
468 for each neuron. For comparisons of unpaired  $\bar{P}_{\text{post}}^{12:20}$ , we use the Mann-Whitney  $U$  test.

469 The estimate of  $\bar{P}^{12:20}$  can be impacted by the number of samples in the mean firing rate or LFP.  
470 For comparisons between conditions with unequal numbers of trials, we also evaluated the mean  
471 difference in  $\bar{P}^{12:20}$  derived from random subsets of  $N_{10}$  trials from the two conditions, where  $N_{10}$  is  
472  $\sim 10\%$  of the number of trials in the condition with the lesser number of trials. We calculated  $\bar{P}^{12:20}$   
473 from the spike rate averages in the two conditions and took the difference,  $D_{\text{pow}}$ . We repeated this  
474 procedure 1000 times and used the mean,  $D_{\text{pow}}^-$ , as the estimate. We compared this test statistic to  
475 its distribution under the null hypothesis, by repeating the identical procedure on random subsets  
476 drawn from the union of the data from the two conditions, again using 1000 repetitions to achieve  
477 a sample of  $D_{\text{pow}}^-$  under the null hypothesis. We repeated this 100 times to estimate its distribution,  
478 and calculated the p-values from the tail probabilities (2-tailed). This bootstrap procedure produces  
479 qualitatively similar results to those obtained from the Mann-Whitney  $U$  in almost all cases (e.g.,  
480 comparison of  $\bar{P}^{12:20}$  triggered by motion onset in the old data sets). The two exceptions are the  
481 comparison of  $\bar{P}^{12:20}$  after motion onset on correct vs. errors and on blocks of variable location  
482 and fixed location of the RDM. This is why we qualify our interpretation of these findings.

483 For single neuron analyses, the data from each neuron was divided into 50 trial blocks. For  
484 each block we obtain  $\bar{P}_{\text{pre}}^{12:20}$  and  $\bar{P}_{\text{post}}^{12:20}$  and applied a Wilcoxon signed rank test to evaluate the null  
485 hypothesis of identical means.

#### 486 Cell type analysis

487 Spike waveforms were preserved for 42 neurons from monkey Np. Neurons were classified as  
488 putative excitatory or inhibitory based on the distance,  $D$  between the peak and trough of the  
489 average spike waveforms. All but two were classified as either putative inhibitory ( $D \leq 150$   $\mu\text{s}$ ) or  
490 excitatory ( $D \geq 350$   $\mu\text{s}$ ; *Barthó et al. 2004; Trainito et al. 2019; Ardid et al. 2015*).

#### 491 Spike-field alignment

492 To assess the relationship between the oscillations in firing rate and local field potential, we esti-  
493 mated the phase of the LFP associated with all spikes that occur in an epoch 40–130 ms after cue  
494 onset. The analysis was restricted to neuron-LFP recordings where the MP algorithm identified  
495 oscillations in the LFP (31 of 104 experiments; cued attention task), based on the criterion that at

496 least one of the 10 strongest atoms (Gabor functions) overlapped the epoch and frequency band  
497 of interest (i.e., 12–20 Hz), based on its carrier. We used the inverse cosine of the latter to associate  
498 the time of each spike with a phase. Thus spikes occurring near the peak or trough of the oscillation  
499 are assigned phases  $\phi_s \approx 0$  and  $\phi_s \approx \pi$ , respectively. To produce the histogram of phase values  
500 in Fig. 6D, we correct for the non-uniform representation of cosine phase in the sampled epochs.  
501 We evaluated the null hypothesis that  $\phi_s$  is uniformly distributed by comparing the empirical (non-  
502 uniform) representation of candidate phases with the distribution of  $\phi_s$  (Kolmogorov-Smirnov two  
503 sample test).

## 504 Acknowledgments

505 We thank Chris Fetsch for piloting initial experiments; Cornel Duhaney and Brian Madeira for ex-  
506 ceptional assistance in animal training and care; Supratim Ray for advice on implementation of the  
507 Matching Pursuit algorithm; Danique Jeurissen, Shushruth, Natalie Steinemann, and Gabe Stine for  
508 comments on an earlier draft of the manuscript.

## 509 References

- 510 **Akam T**, Kullmann DM. Oscillations and filtering networks support flexible routing of information. *Neuron*.  
511 2010; 67(2):308–320.
- 512 **Ardid S**, Vinck M, Kaping D, Marquez S, Everling S, Womelsdorf T. Mapping of functionally characterized  
513 cell classes onto canonical circuit operations in primate prefrontal cortex. *Journal of Neuroscience*. 2015;  
514 35(7):2975–2991.
- 515 **Barthó P**, Hirase H, Monconduit L, Zugaro M, Harris KD, Buzsáki G. Characterization of neocortical principal  
516 cells and interneurons by network interactions and extracellular features. *Journal of neurophysiology*. 2004;  
517 92(1):600–608.
- 518 **Britten KH**, Shadlen MN, Newsome WT, Movshon JA. The analysis of visual motion: a comparison of neuronal  
519 and psychophysical performance. *Journal of Neuroscience*. 1992; 12(12):4745–4765.
- 520 **Buschman TJ**, Kastner S. From behavior to neural dynamics: an integrated theory of attention. *Neuron*. 2015;  
521 88(1):127–144.
- 522 **Buschman TJ**, Miller EK. Serial, covert shifts of attention during visual search are reflected by the frontal eye  
523 fields and correlated with population oscillations. *Neuron*. 2009; 63(3):386–396.
- 524 **Chandran S**, Mishra A, Shirhatti V, Ray S. Comparison of matching pursuit algorithm with other signal process-  
525 ing techniques for computation of the time-frequency power spectrum of brain signals. *Journal of Neuro-*  
526 *science*. 2016; 36(12):3399–3408.
- 527 **Crick F**, Koch C. A framework for consciousness. *Nature neuroscience*. 2003; 6(2):119–126.
- 528 **Dean HL**, Hagan MA, Pesaran B. Only coherent spiking in posterior parietal cortex coordinates looking and  
529 reaching. *Neuron*. 2012; 73(4):829–841.
- 530 **Donner TH**, Siegel M, Oostenveld R, Fries P, Bauer M, Engel AK. Population activity in the human dorsal pathway  
531 predicts the accuracy of visual motion detection. *Journal of Neurophysiology*. 2007; 98(1):345–359.
- 532 **Driver J**. A selective review of selective attention research from the past century. *British Journal of Psychology*.  
533 2001; 92:53–78. doi: 10.1348/000712601162103.
- 534 **Fetsch CR**, Kiani R, Newsome WT, Shadlen MN. Effects of cortical microstimulation on confidence in a percep-  
535 tual decision. *Neuron*. 2014; 83(4):20.
- 536 **Fiebelkorn IC**, Pinsk MA, Kastner S. A dynamic interplay within the frontoparietal network underlies rhythmic  
537 spatial attention. *Neuron*. 2018; 99(4):842–853.
- 538 **Fiebelkorn IC**, Pinsk MA, Kastner S. The mediodorsal pulvinar coordinates the macaque fronto-parietal net-  
539 work during rhythmic spatial attention. *Nature communications*. 2019; 10(1):1–15.
- 540 **Fiebelkorn IC**, Saalman YB, Kastner S. Rhythmic sampling within and between objects despite sustained  
541 attention at a cued location. *Current Biology*. 2013; 23(24):2553–2558.

- 542 **Freeman R**, Sclar G, Ohzawa I. An electrophysiological comparison of convergent and divergent strabismus in  
543 the cat: visual evoked potentials. *Journal of neurophysiology*. 1983; 49(1):227–237.
- 544 **Fries P**. A mechanism for cognitive dynamics: neuronal communication through neuronal coherence. *Trends*  
545 *in cognitive sciences*. 2005; 9(10):474–480.
- 546 **Fries P**. Rhythms for cognition: communication through coherence. *Neuron*. 2015; 88(1):220–235.
- 547 **Fries P**, Reynolds JH, Rorie AE, Desimone R. Modulation of oscillatory neuronal synchronization by selective  
548 visual attention. *Science*. 2001; 291(5508):1560–1563.
- 549 **Gold JJ**, Shadlen MN. Representation of a perceptual decision in developing oculomotor commands. *Nature*.  
550 2000; 404(6776):23.
- 551 **Gregoriou GG**, Gotts SJ, Desimone R. Cell-type-specific synchronization of neural activity in FEF with V4 during  
552 attention. *Neuron*. 2012; 73(3):581–594.
- 553 **Gregoriou GG**, Gotts SJ, Zhou H, Desimone R. High-frequency, long-range coupling between prefrontal and  
554 visual cortex during attention. *science*. 2009; 324(5931):1207–1210.
- 555 **Haegens S**, Nácher V, Hernández A, Luna R, Jensen O, Romo R. Beta oscillations in the monkey sensorimotor  
556 network reflect somatosensory decision making. *Proceedings of the National Academy of Sciences*. 2011;  
557 108(26):10708–10713.
- 558 **Hanks TD**, Mazurek ME, Kiani R, Hopp E, Shadlen MN. Elapsed decision time affects the weighting of prior  
559 probability in a perceptual decision task. *Journal of Neuroscience*. 2011; 31(17):6339–6352.
- 560 **Kiani R**, Hanks TD, Shadlen MN. Bounded integration in parietal cortex underlies decisions even when viewing  
561 duration is dictated by the environment. *Journal of Neuroscience*. 2008; 28(12):19.
- 562 **Koelewijn T**, van Schie HT, Bekkering H, Oostenveld R, Jensen O. Motor-cortical beta oscillations are modulated  
563 by correctness of observed action. *Neuroimage*. 2008; 40(2):767–775.
- 564 **König P**, Engel AK, Singer W. Relation between oscillatory activity and long-range synchronization in cat visual  
565 cortex. In: *Proceedings of the national academy of sciences* 92 no. 1; 1995. p. 290–294.
- 566 **Lee JH**, Whittington MA, Kopell NJ. Top-down beta rhythms support selective attention via interlaminar inter-  
567 action: a model. *PLoS computational biology*. 2013; 9(8).
- 568 **Lewis JW**, Van Essen DC. Corticocortical connections of visual, sensorimotor, and multimodal processing areas  
569 in the parietal lobe of the macaque monkey. *Journal of Comparative Neurology*. 2000; 428(1):112–137.
- 570 **Magee JC**, Grienberger C. Synaptic Plasticity Forms and Functions. *Annual Review of Neuroscience*. 2020;  
571 43(1):1–23. doi: 10.1146/annurev-neuro-090919-022842.
- 572 **Mallat SG**, Zhang Z. Matching pursuits with time-frequency dictionaries. *IEEE Transactions on signal processing*.  
573 1993; 41(12):3397–3415.
- 574 **National Research Council**. Guide for the Care and Use of Laboratory Animals: Eighth Edi-  
575 tion. Washington, DC: The National Academies Press; 2011. [https://www.nap.edu/catalog/12910/  
576 guide-for-the-care-and-use-of-laboratory-animals-eighth](https://www.nap.edu/catalog/12910/guide-for-the-care-and-use-of-laboratory-animals-eighth), doi: 10.17226/12910.
- 577 **Newsome WT**, Pare EB. A selective impairment of motion perception following lesions of the middle temporal  
578 visual area (MT). *Journal of Neuroscience*. 1988; 8(6):2201–2211.
- 579 **Panichello MF**, Buschman TJ. Shared mechanisms underlie the control of working memory and attention.  
580 *Nature*. 2021; 592(7855):601–605. doi: 10.1038/s41586-021-03390-w.
- 581 **Pesaran B**, Nelson MJ, Andersen RA. Free choice activates a decision circuit between frontal and parietal cortex.  
582 *Nature*. 2008; 453(7193):406–409.
- 583 **Posner MI**. Structures and function of selective attention. *American Psychological Association*; 1988.
- 584 **Posner MI**, Snyder CR, Solso R. Attention and cognitive control. *Cognitive psychology: Key readings*. 2004; 205.
- 585 **Quinn KR**, Seillier L, Butts DA, Nienborg H. Decision-related feedback in visual cortex lacks spatial selectivity.  
586 *Nature Communications*. 2021; 12(1):4473. doi: 10.1038/s41467-021-24629-0.

- 587 **Roitman JD**, Shadlen MN. Response of neurons in the lateral intraparietal area during a combined visual  
588 discrimination reaction time task. *The Journal of neuroscience*. 2002; 22:9475–89.
- 589 **Saalmann YB**, Pigarev IN, Vidyasagar TR. Neural mechanisms of visual attention: how top-down feedback  
590 highlights relevant locations. *Science*. 2007; 316(5831):1612–1615.
- 591 **Salzman CD**, Murasugi CM, Britten KH, Newsome WT. Microstimulation in visual area MT: Effects on direction  
592 discrimination performance. *Journal of Neuroscience*. 1992; 12(6):2331–55.
- 593 **Shadlen MN**, Kandel ER. Decision-Making and Consciousness. In: Kandel ER, Koester JD, Mack SH, Siegelbaum  
594 SA, editors. *Principles of Neural Science*, 6e New York, NY: McGraw Hill; 2021. [neurology.mhmedical.com/content.aspx?aid=1180646321](https://www.ncbi.nlm.nih.gov/pmc/articles/PMC8111111/content.aspx?aid=1180646321).  
595
- 596 **Shadlen MN**, Kiani R. Decision Making as a Window on Cognition. *Neuron*. 2013; 80(3):791 – 806. doi:  
597 [10.1016/j.neuron.2013.10.047](https://doi.org/10.1016/j.neuron.2013.10.047).
- 598 **Shadlen MN**, Newsome WT. Motion perception: seeing and deciding. *Proceedings of the national academy of*  
599 *sciences*. 1996; 93(2):628–633.
- 600 **Shushruth S**, Mazurek M, Shadlen MN. Comparison of Decision-Related Signals in Sensory and Motor Preparatory  
601 Responses of Neurons in Area LIP. *Journal of Neuroscience*. 2018; 11(38):28.
- 602 **Siegel M**, Engel AK, Donner TH. Cortical network dynamics of perceptual decision-making in the human brain.  
603 *Frontiers in human neuroscience*. 2011; 5. <https://doi.org/10.3389/fnhum.2011.00021>.
- 604 **Singer W**, Gray CM. Visual feature integration and the temporal correlation hypothesis. *Annual review of*  
605 *neuroscience*. 1995; 18(1):555–586.
- 606 **Stanley DA**, Roy JE, Aoi MC, Kopell NJ, Miller EK. Low-beta oscillations turn up the gain during category judg-  
607 ments. *Cerebral Cortex*. 2018; 28(1):116–130. <https://doi.org/10.1093/cercor/bhw356>.
- 608 **Suzuki M**, Larkum ME. Dendritic calcium spikes are clearly detectable at the cortical surface. *Nature commu-*  
609 *nications*. 2017 08; 8(1):276. doi: 10.1038/s41467-017-00282-4.
- 610 **Trainito C**, von Nicolai C, Miller EK, Siegel M. Extracellular spike waveform dissociates four functionally distinct  
611 cell classes in primate cortex. *Current Biology*. 2019; 29(18):2973–2982.
- 612 **Urai AE**, Gee JWd, Tsetsos K, Donner TH. Choice history biases subsequent evidence accumulation. *eLife*. 2019;  
613 8:e46331. doi: [10.7554/elife.46331](https://doi.org/10.7554/elife.46331).
- 614 **Williams AH**, Poole B, Maheswaranathan N, Dhawale AK, Fisher T, Wilson CD, Brann DH, Trautmann EM, Ryu S,  
615 Shusterman R, et al. Discovering precise temporal patterns in large-scale neural recordings through robust  
616 and interpretable time warping. *Neuron*. 2020; 105(2):246–259.
- 617 **Zhang W**, Bruno RM. High-order thalamic inputs to primary somatosensory cortex are stronger and longer  
618 lasting than cortical inputs. *Elife*. 2019; 8. <https://doi.org/10.7554/eLife.44158>.
- 619 **Zylberberg A**, Fernández Slezak D, Roelfsema PR, Dehaene S, Sigman M. The brain's router: A cortical network  
620 model of serial processing in the primate brain. *PLoS Comput Biol*. 2010; 6(4):e1000765. doi: [10.1371/jour-](https://doi.org/10.1371/journal.pcbi.1000765)  
621 [nal.pcbi.1000765](https://doi.org/10.1371/journal.pcbi.1000765).

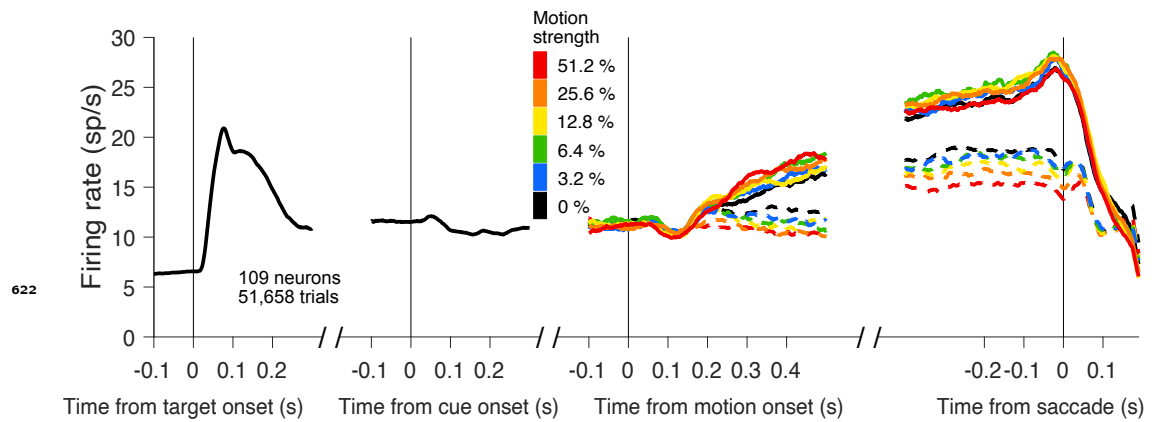

**Figure 3—figure supplement 1. Firing rates aligned to all task relevant events.** These are the same data in Fig. 3. From left to right, responses are aligned to target onset, cue onset, motion onset, and saccade. For motion and saccade epochs, warmer colors indicate stronger motion. Solid and dashed traces indicate choices to the target in and out of the response field, respectively.

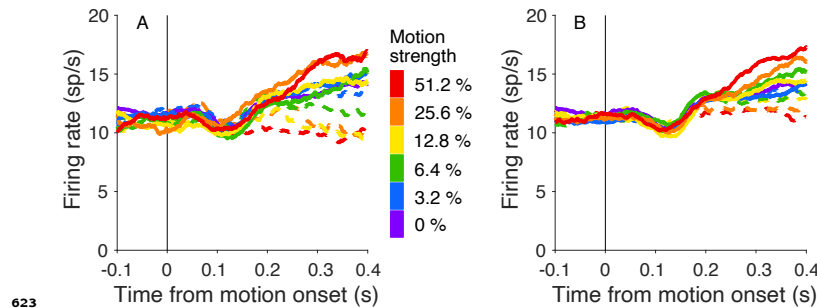

**Figure 3—figure supplement 2. Comparison of responses when motion patches had the same or opposite directions.** The graphs use the combined data from both monkeys without detrending, including error trials. **A**, LIP activity for trials with motion in the same direction in both patches. Firing rates are averages using all trials with the same motion strength (color) and direction (line style). The responses begin to exhibit a dependency on motion direction and strength  $\sim 180$  ms after motion onset. **B**, LIP activity for trials with opposite directions of motion in the two patches. Activity follows the same general pattern seen in **A**, but the dependency on motion strength is less apparent.

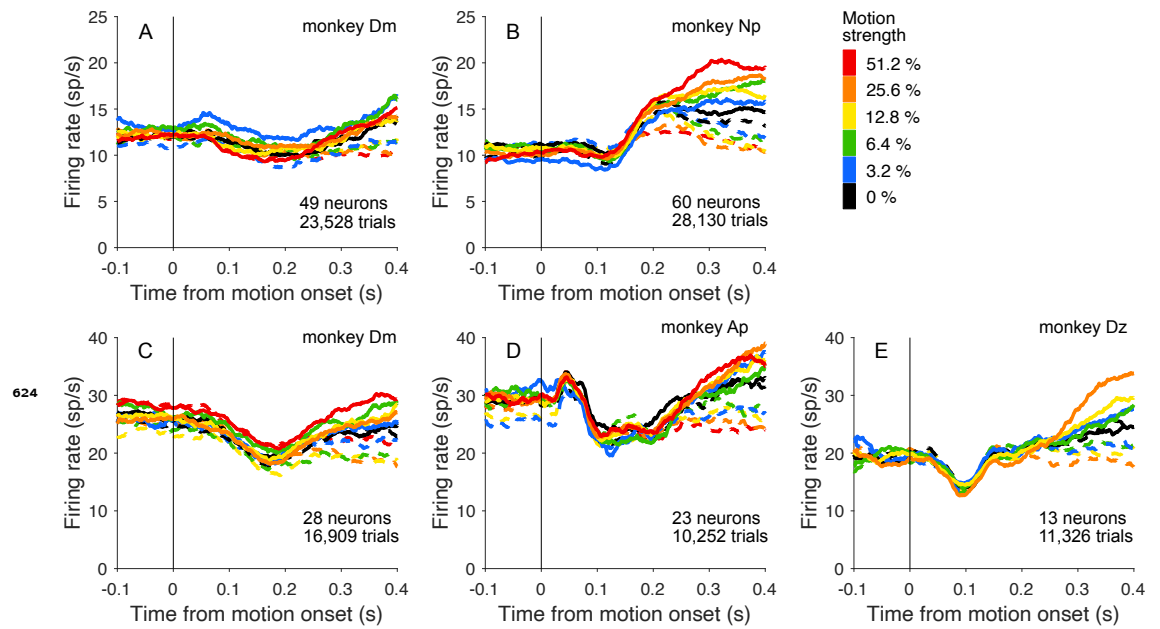

**Figure 3—figure supplement 3. Neural response shown separately for each monkey and task.** Data are from the same neurons included in Fig. 3 shown here without detrending. **A,B**, Average firing rate aligned to motion onset in the cued attention task. **C-E**, Average firing rate aligned to motion onset in the variable location task.

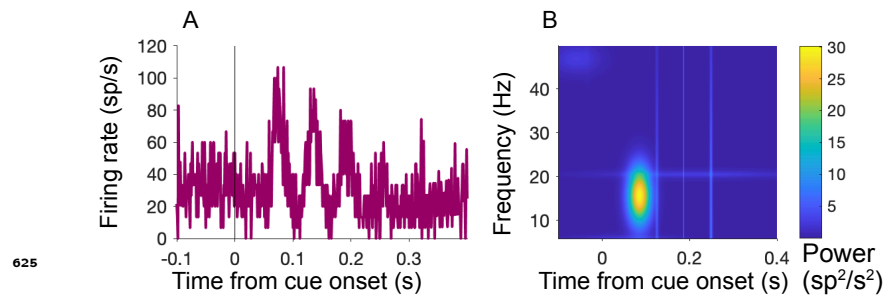

**Figure 4—figure supplement 1. Oscillations in spiking activity measured using a matching pursuit algorithm.** The algorithm uses a greedy method to fit the waveform using a dictionary of Gabor functions of time (Eq. 6). **A**, Input to matching pursuit algorithm. The average firing rate is rendered as a peristimulus aligned histogram (1 ms bin width) from neuron Dm49 aligned to cue onset (same 150 shown in Fig. 4A). **B**, Output of matching pursuit algorithm. Heat map shows power (color) by frequency and time from cue onset.



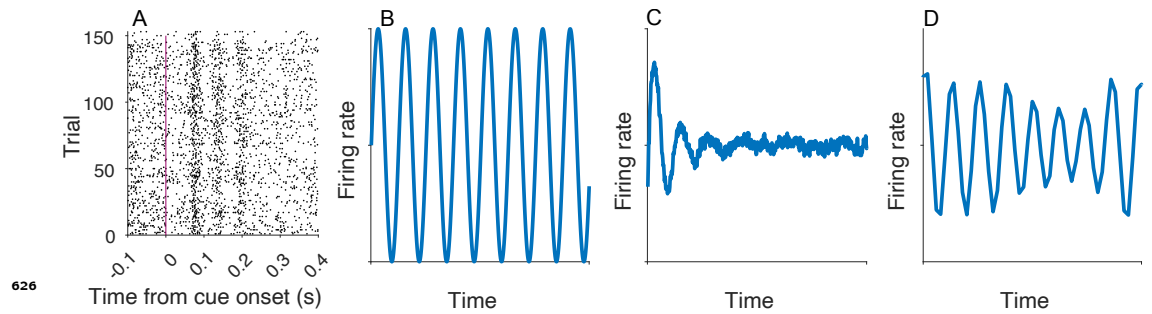

**Figure 4—figure supplement 2. Realignment does not identify additional peaks.** **A**, Activity re-aligned using the affinewarp algorithm (*Williams et al., 2020*). **B–D**, Affinewarp can recover temporally jittered oscillations in synthetic data. **B**, Input oscillation. **C**, Mean activity of 500 simulated trials using the firing from **B**, with increasing temporal jitter. For each trial temporal noise is added at each time point before generating spikes, causing the oscillations to become misaligned in time and to disappear from the average. **D**, Average firing rate of the activity of the trials shown in **C** after applying the affinewarp algorithm. The underlying oscillation is partially recovered.

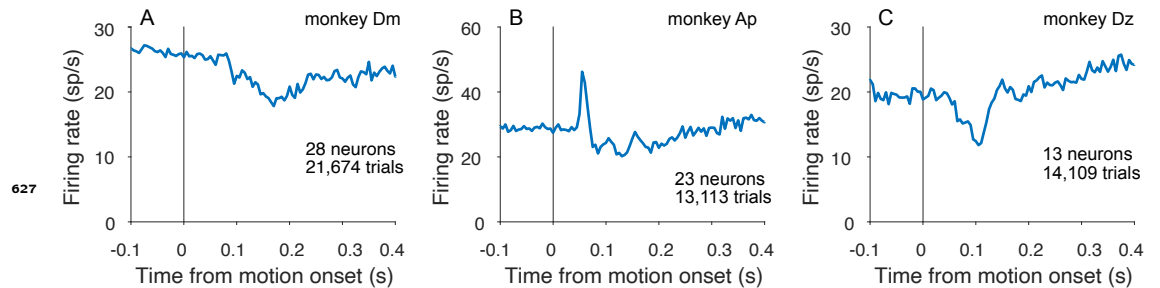

**Figure 7—figure supplement 1. Oscillations in the variable location task for each monkey.** Average firing rates, aligned to motion onset.
